# Supplementary material for: Antineutrophil cytoplasmic antibodies in infective endocarditis: a case report and systematic review of the literature
Source: PubMed Central journal article supplement (PMC9485185; doi:10.1007/s10067-022-06240-w), 2022-06-23

**Online Resource 6.** Flow diagram of treatments given with details regarding treatment rationale and/or chronology

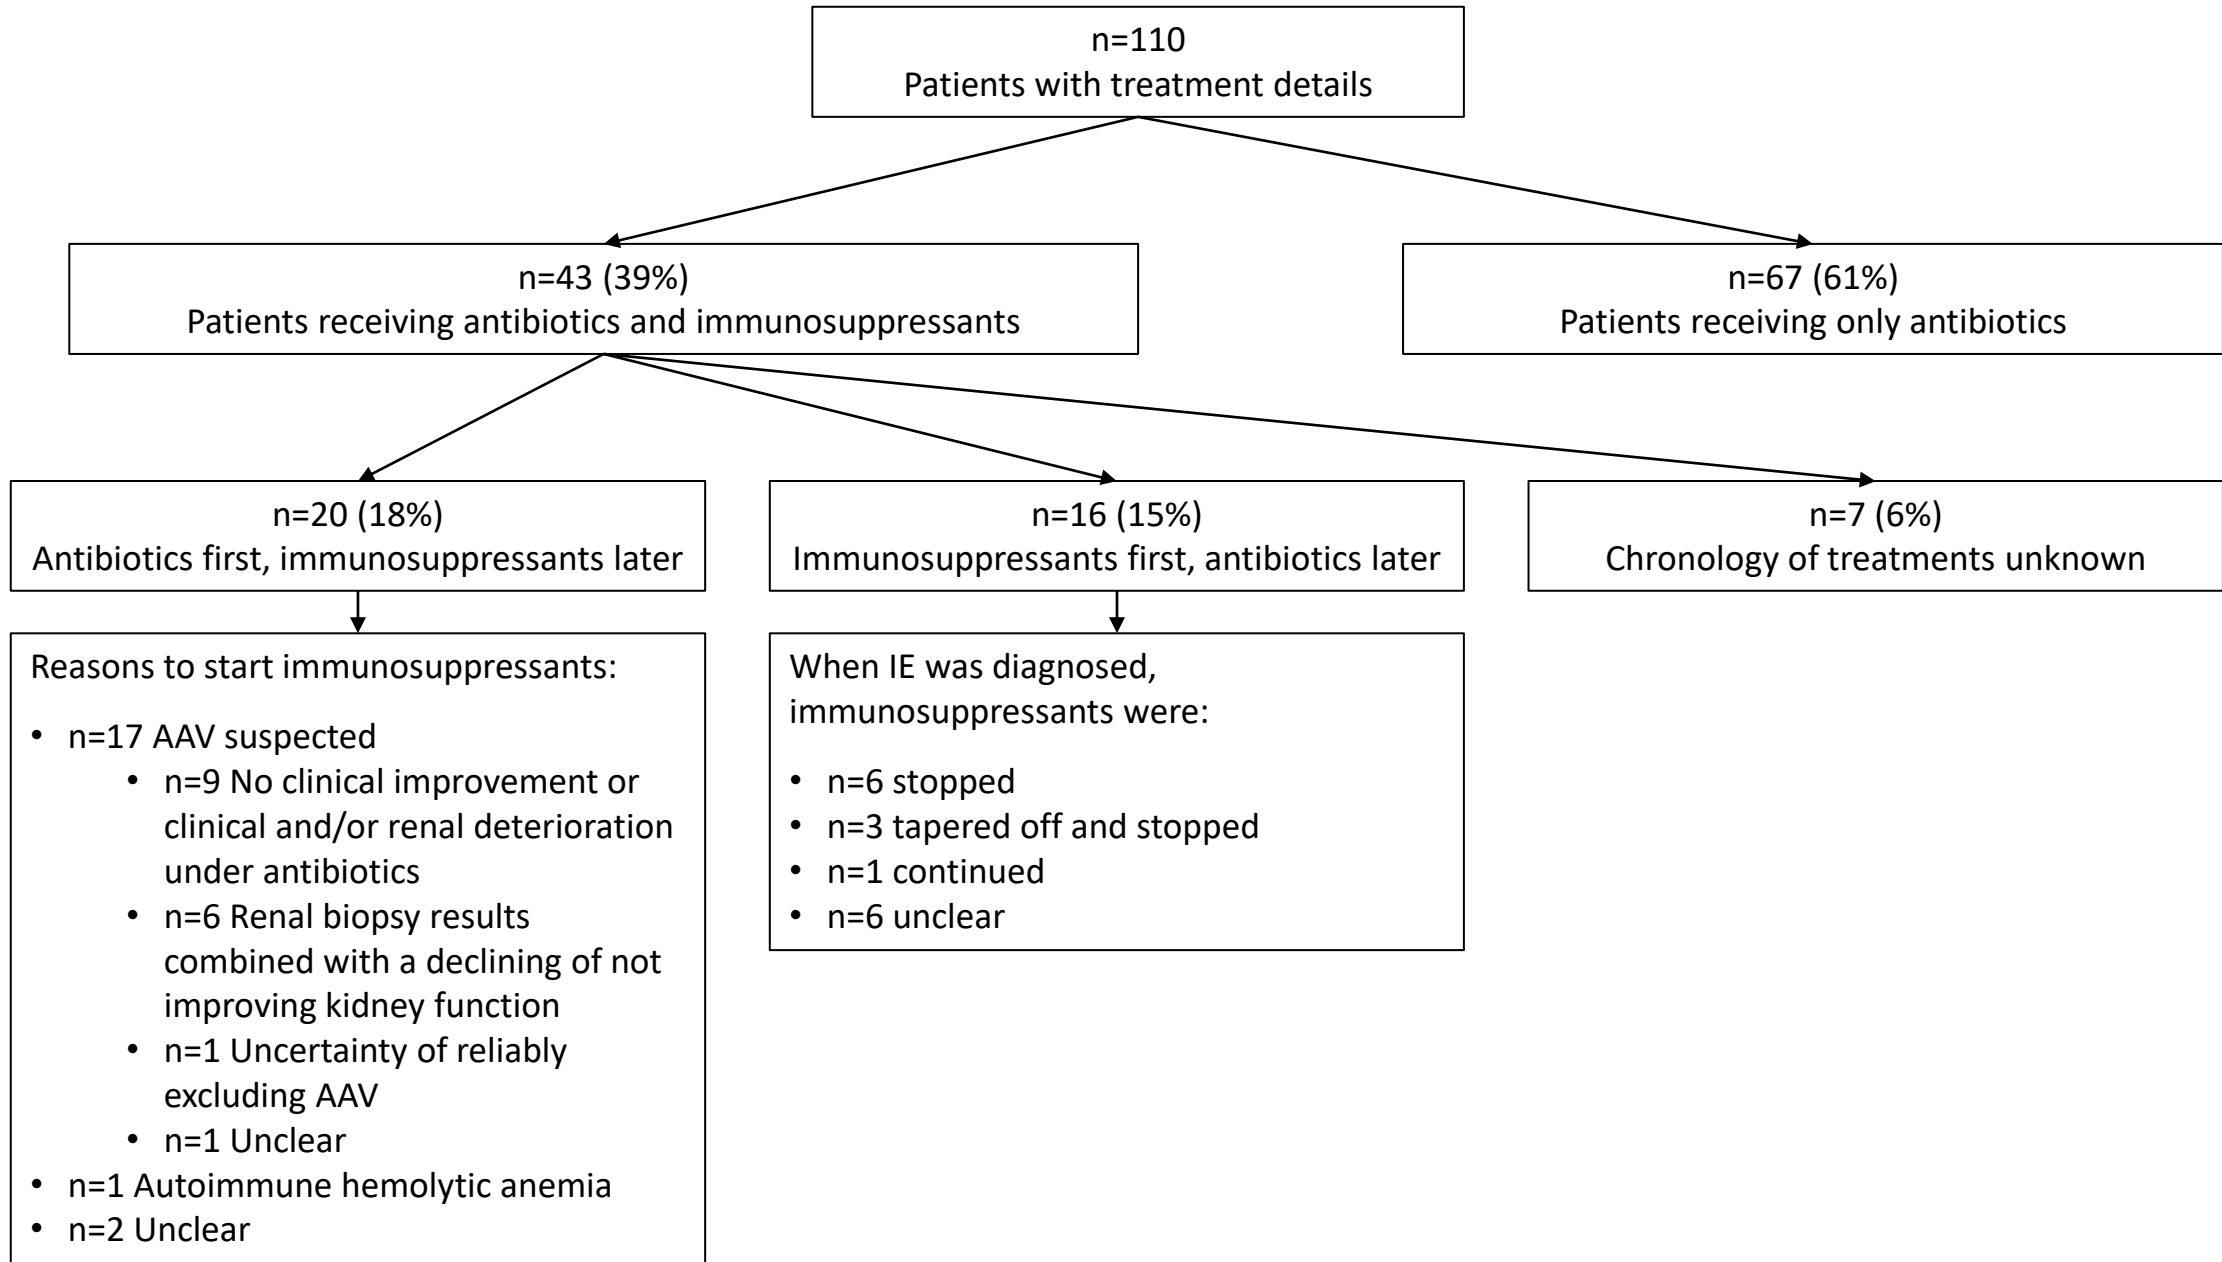

Supplement: 10067_2022_6240_MOESM6_ESM.pdf [file 10067_2022_6240_MOESM6_ESM.pdf]
